# Supplementary material
Source: Springer Nature journal article supplement (https://www.springermedizin.de/resource/supplementary/12946_2009_125_MOESM7_ESM.pdf/9555616)
Supplement: MOESM7 [file 9555616]

Number of differentially expressed genes

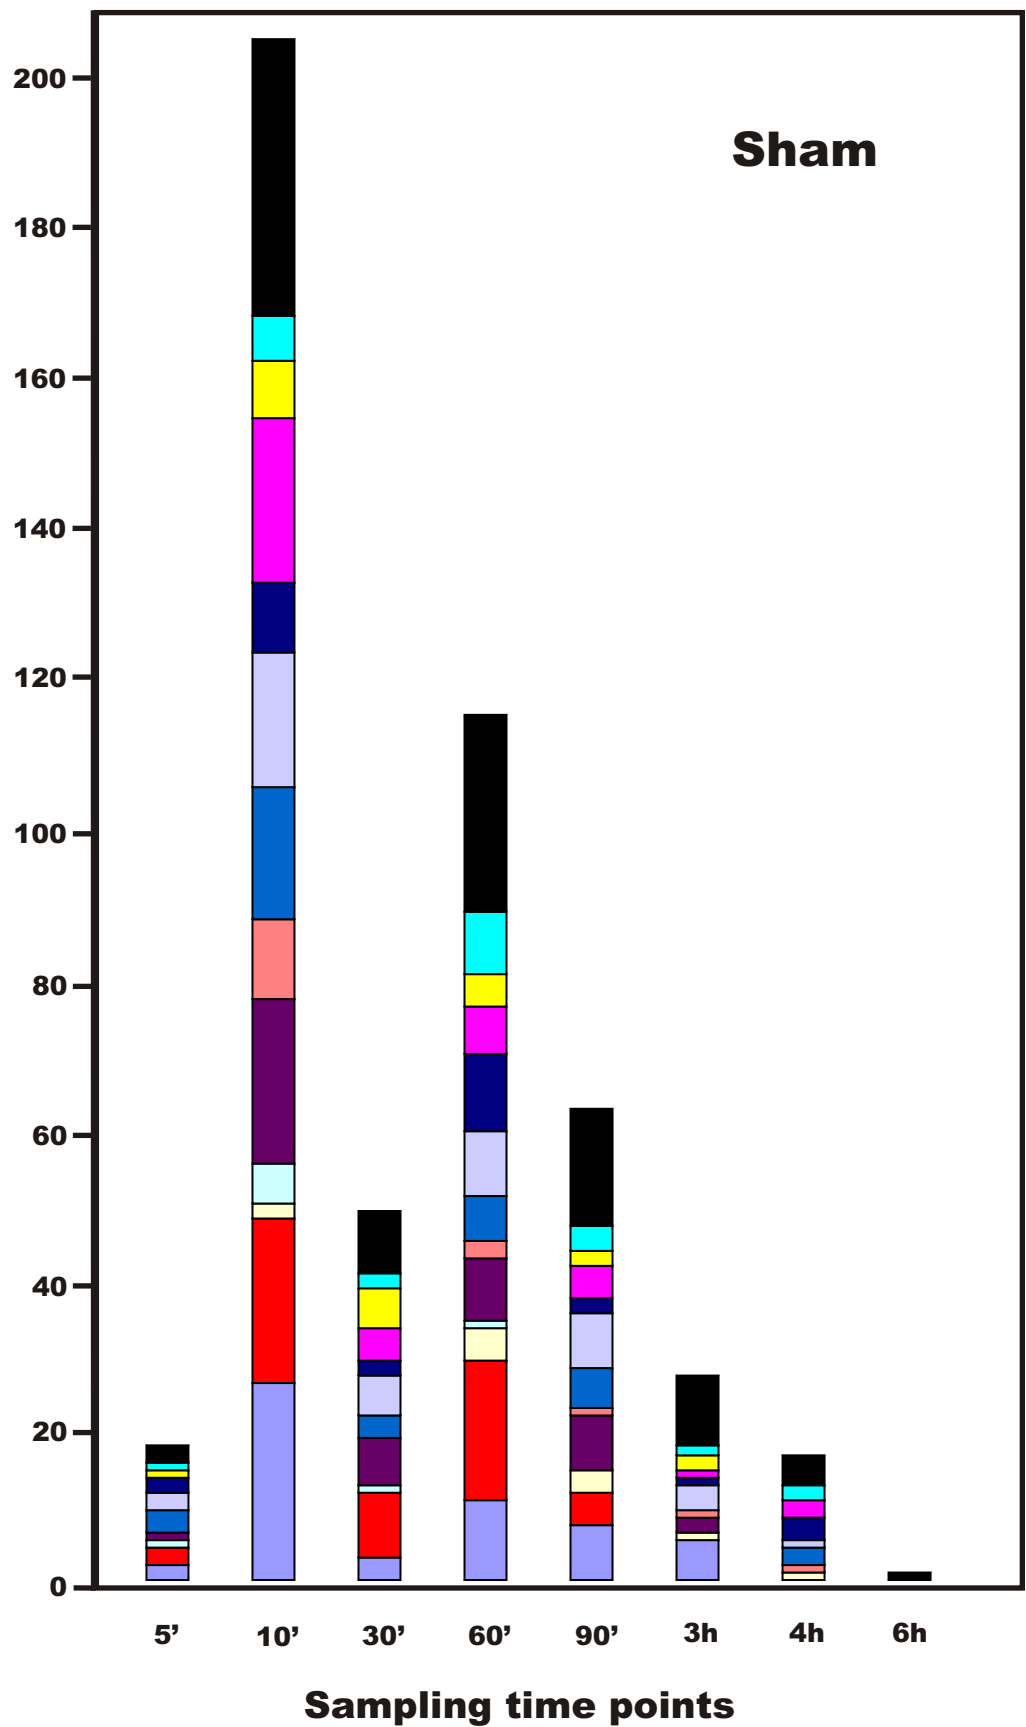

Number of differentially expressed genes

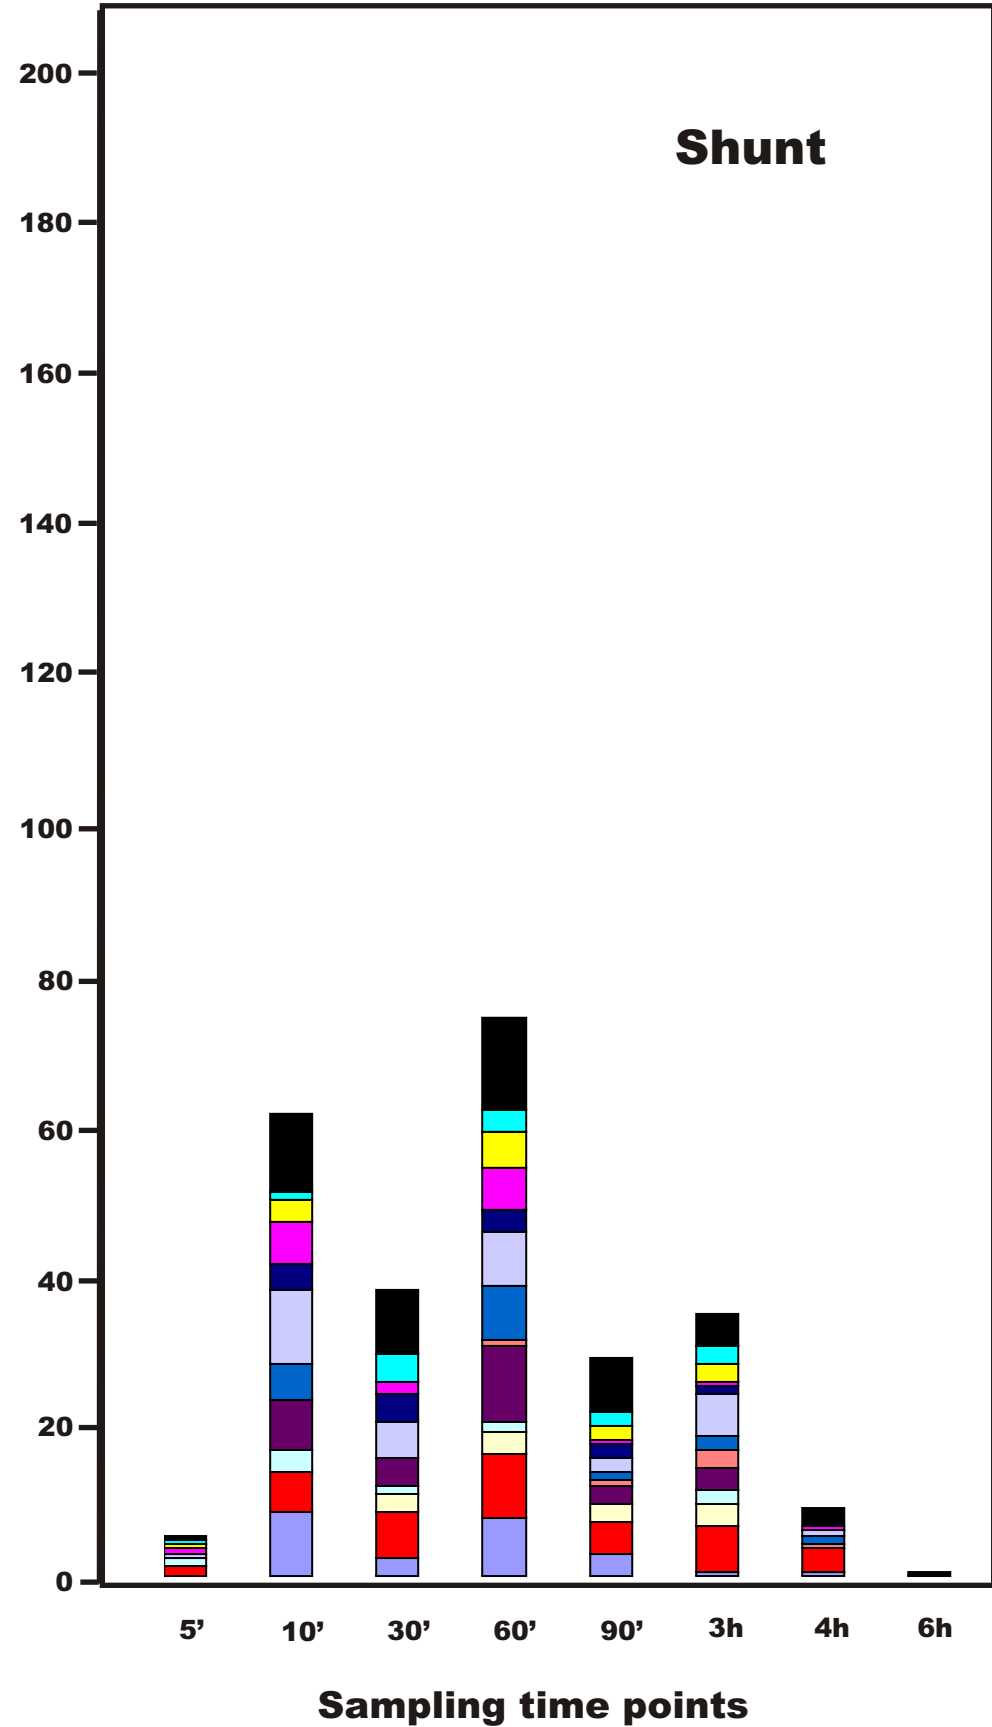

### Cellular process & Molecular function

- Function unknown
- Other
- Lipd, hormone, amine, alcohol, metab
- Cell proliferation, growth
- Nucleic acid metabolism
- Oxidoreductase activity
- Protein metabolism
- Transport
- Translation
- Cell signalling, signal transduction
- Inflammation, acute phase response
- Extracellular matrix, cytoskeleton
- Cell cycle, apoptosis
- Transcription
